# Supplementary material for: Decreased consumption of natural rewards in rhesus monkeys with prolonged methamphetamine abstinence
Source: Frontiers journal article supplement (doi:10.3389/fpsyt.2024.1446353), 2024-09-06
Supplement: Data_Sheet_1.pdf [file Data_Sheet_1.pdf]

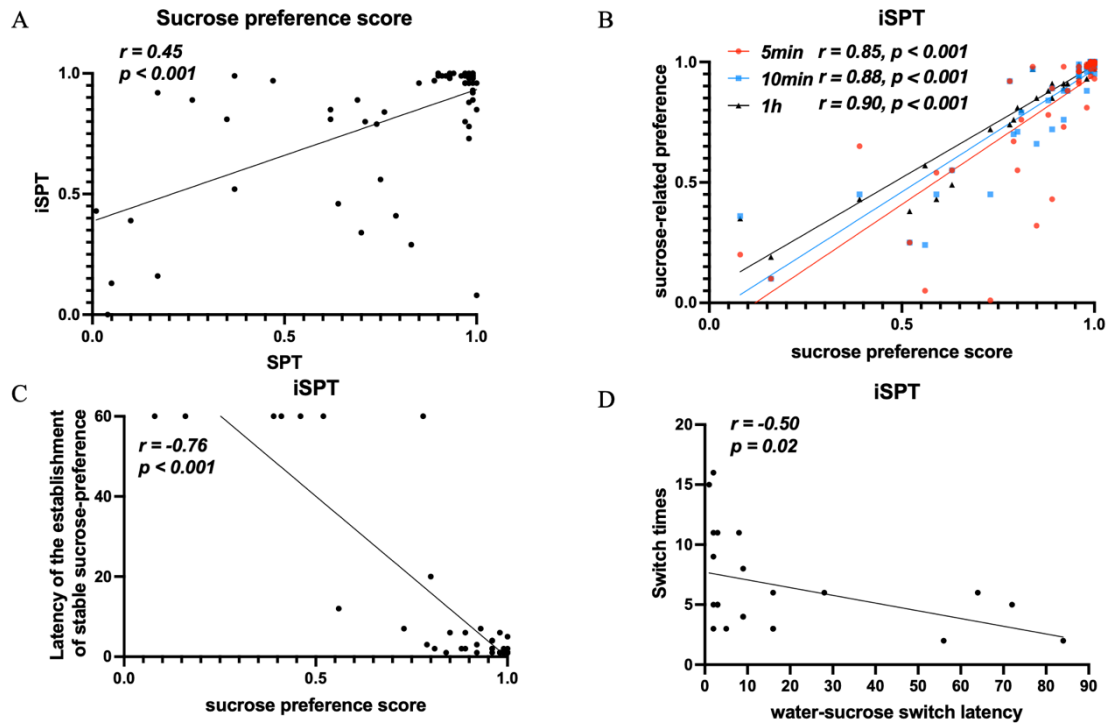

**Figure S1**

Results of the traditional sucrose preference score (SPT) and the improved sucrose preference test (iSPT) in all sessions of  $n=16$  control and  $n=5$  METH abstinent monkeys

- The correlation of SPT and iSPT results in all 16 control and 5 METH exposed monkeys,  $r = 0.45$ ,  $p < 0.001$  (Spearman's correlation coefficient).
- The correlations between sucrose preference scores and the sucrose-related preference in shorter observation periods: 5 minutes ( $r = 0.85$ ,  $p < 0.001$ ), 10 minutes ( $r = 0.88$ ,  $p < 0.001$ ) and 1 hour ( $r = 0.90$ ,  $p < 0.001$ ) in all sessions of 16 (13 control and 3 METH) monkeys with video data. Spearman's correlation coefficient.
- The correlation between the sucrose preference score and the latency of the establishment of stable sucrose-preference with iSPT in all sessions of 16 monkeys with video data,  $r = -0.76$ ,  $p < 0.001$ . Spearman's correlation coefficient.
- The correlation between water-sucrose switch latency and switch times with iSPT in all sessions of 16 monkeys with video data,  $r = -0.50$ ,  $p = 0.02$ . Spearman's correlation coefficient.

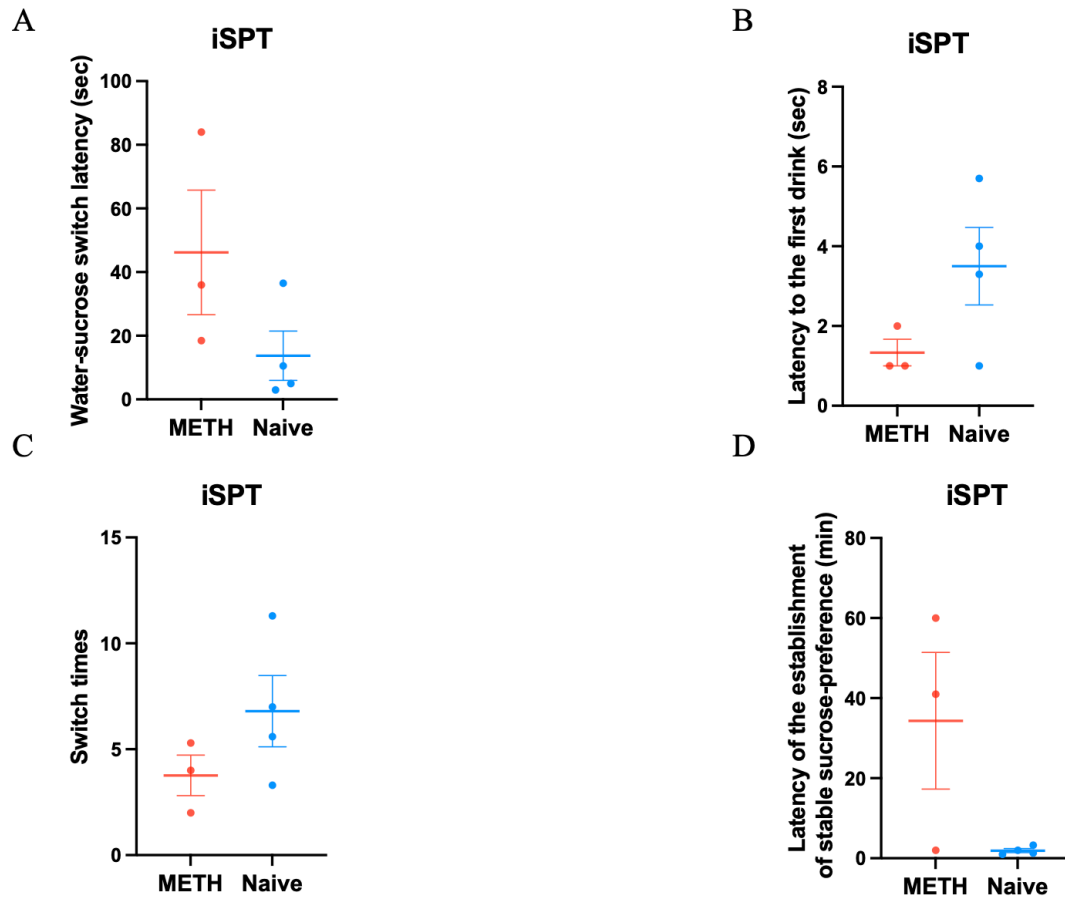

**Figure S2**

*New outcomes obtained from the improved sucrose preference test (iSPT) between the two groups, comprising 4 control and 3 METH abstinent monkeys in individual data.*

- A) Water-sucrose switch latency obtained from iSPT in individual monkey for both groups. Mean  $\pm$  SEM.*
- B) Latency to the first drink obtained from iSPT in individual monkey for both groups. Mean  $\pm$  SEM.*
- C) Switch times obtained from iSPT in individual monkey for both groups. Mean  $\pm$  SEM.*
- D) Latency of the establishment of stable sucrose-preference obtained from iSPT in individual monkey for both groups. Mean  $\pm$  SEM.*

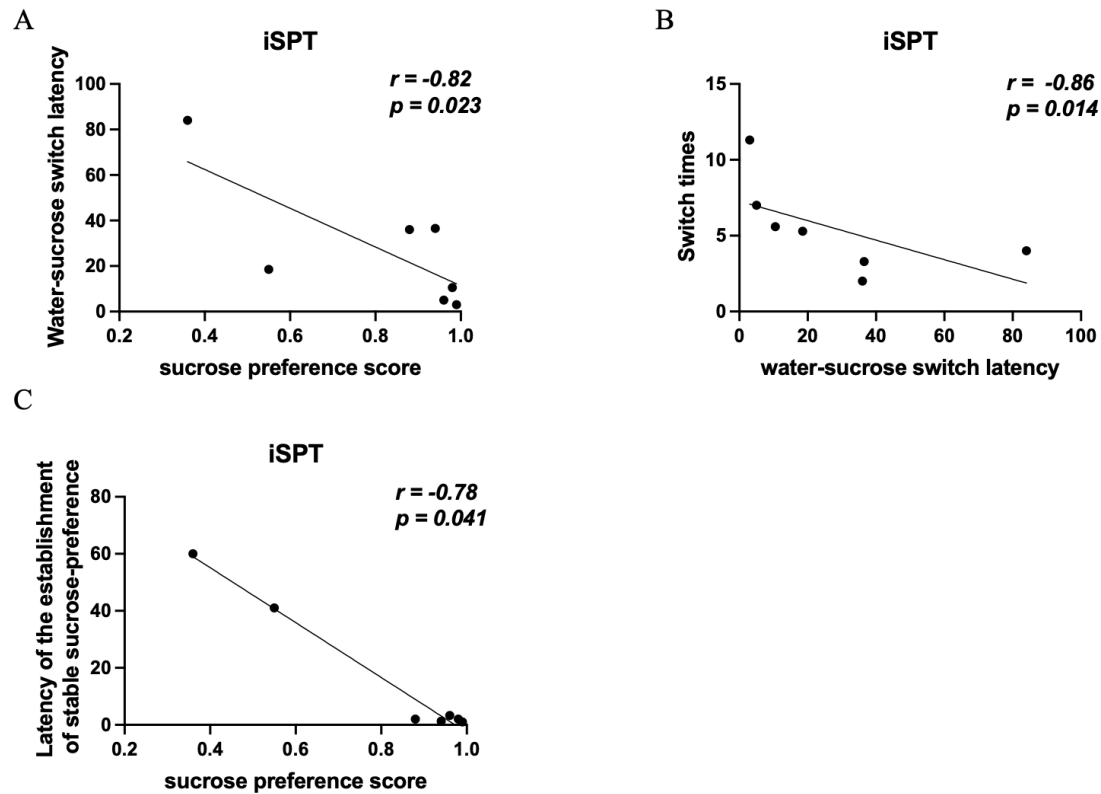

**Figure S3**

*Results in videotaped individuals of the age-matched METH exposed ( $n=3$ ) and control ( $n=4$ ) monkeys*

- A) *The correlation between the water-sucrose switch latency and the sucrose preference score with iSPT,  $r = -0.82$ ,  $p = 0.023$ . Spearman's correlation coefficient.*
- B) *The correlation between the water-sucrose switch latency and switch times with iSPT,  $r = -0.86$ ,  $p = 0.014$ . Spearman's correlation coefficient.*
- C) *The correlation between the latency of the establishment of stable sucrose-preference and the sucrose preference score with iSPT,  $r = -0.78$ ,  $p = 0.041$ . Spearman's correlation coefficient.*

**Table S1**

Results of new outcome obtained from the improved sucrose preference test (iSPT) of the naive versus METH abstinent group (Mean  $\pm$  SD)

|                                                                    | Group             |                   |
|--------------------------------------------------------------------|-------------------|-------------------|
|                                                                    | METH              | Naive             |
| Latency to the first drink (sec)                                   | 2.00 $\pm$ 1.00   | 3.50 $\pm$ 1.95   |
| Water-sucrose switch latency (sec)                                 | 46.17 $\pm$ 33.91 | 13.75 $\pm$ 15.49 |
| Switch times                                                       | 3.78 $\pm$ 1.67   | 6.80 $\pm$ 3.37   |
| Latency of the establishment of stable<br>sucrose-preference (min) | 34.33 $\pm$ 29.57 | 1.90 $\pm$ 1.02   |

*\*All group differences were all not significant, independent of whether they were analyzed using ANCOVA or the Mantel-Cox test.*
